# Supplementary material
Source: bioRxiv or medRxiv preprint supplement (https://www.biorxiv.org/highwire/filestream/52865/field_highwire_adjunct_files/1/176032-2.pdf)

**A**

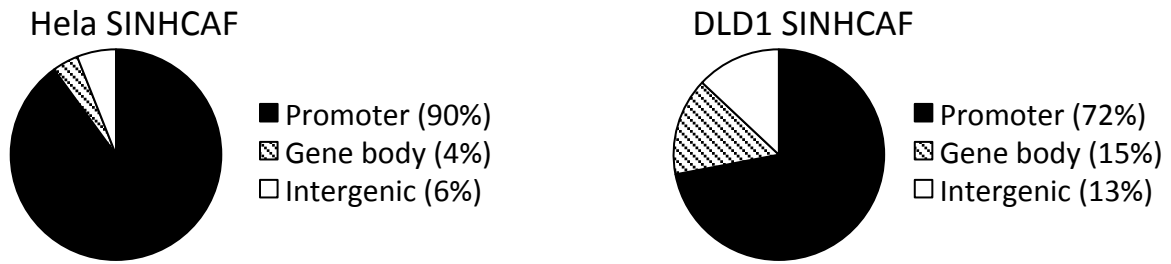

**B**

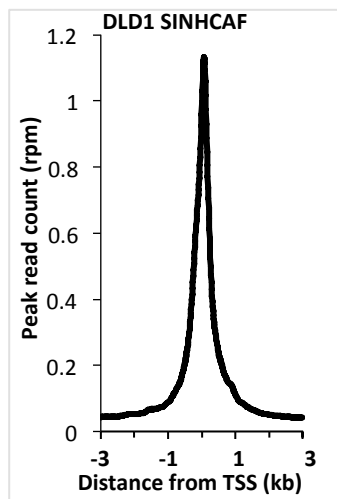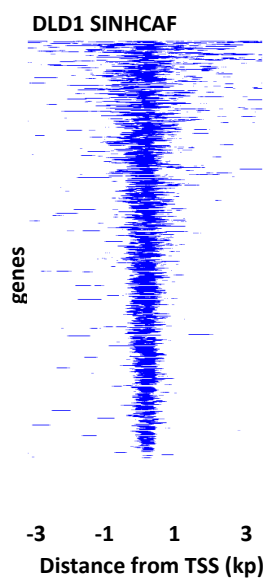

# Sup. Figure S2

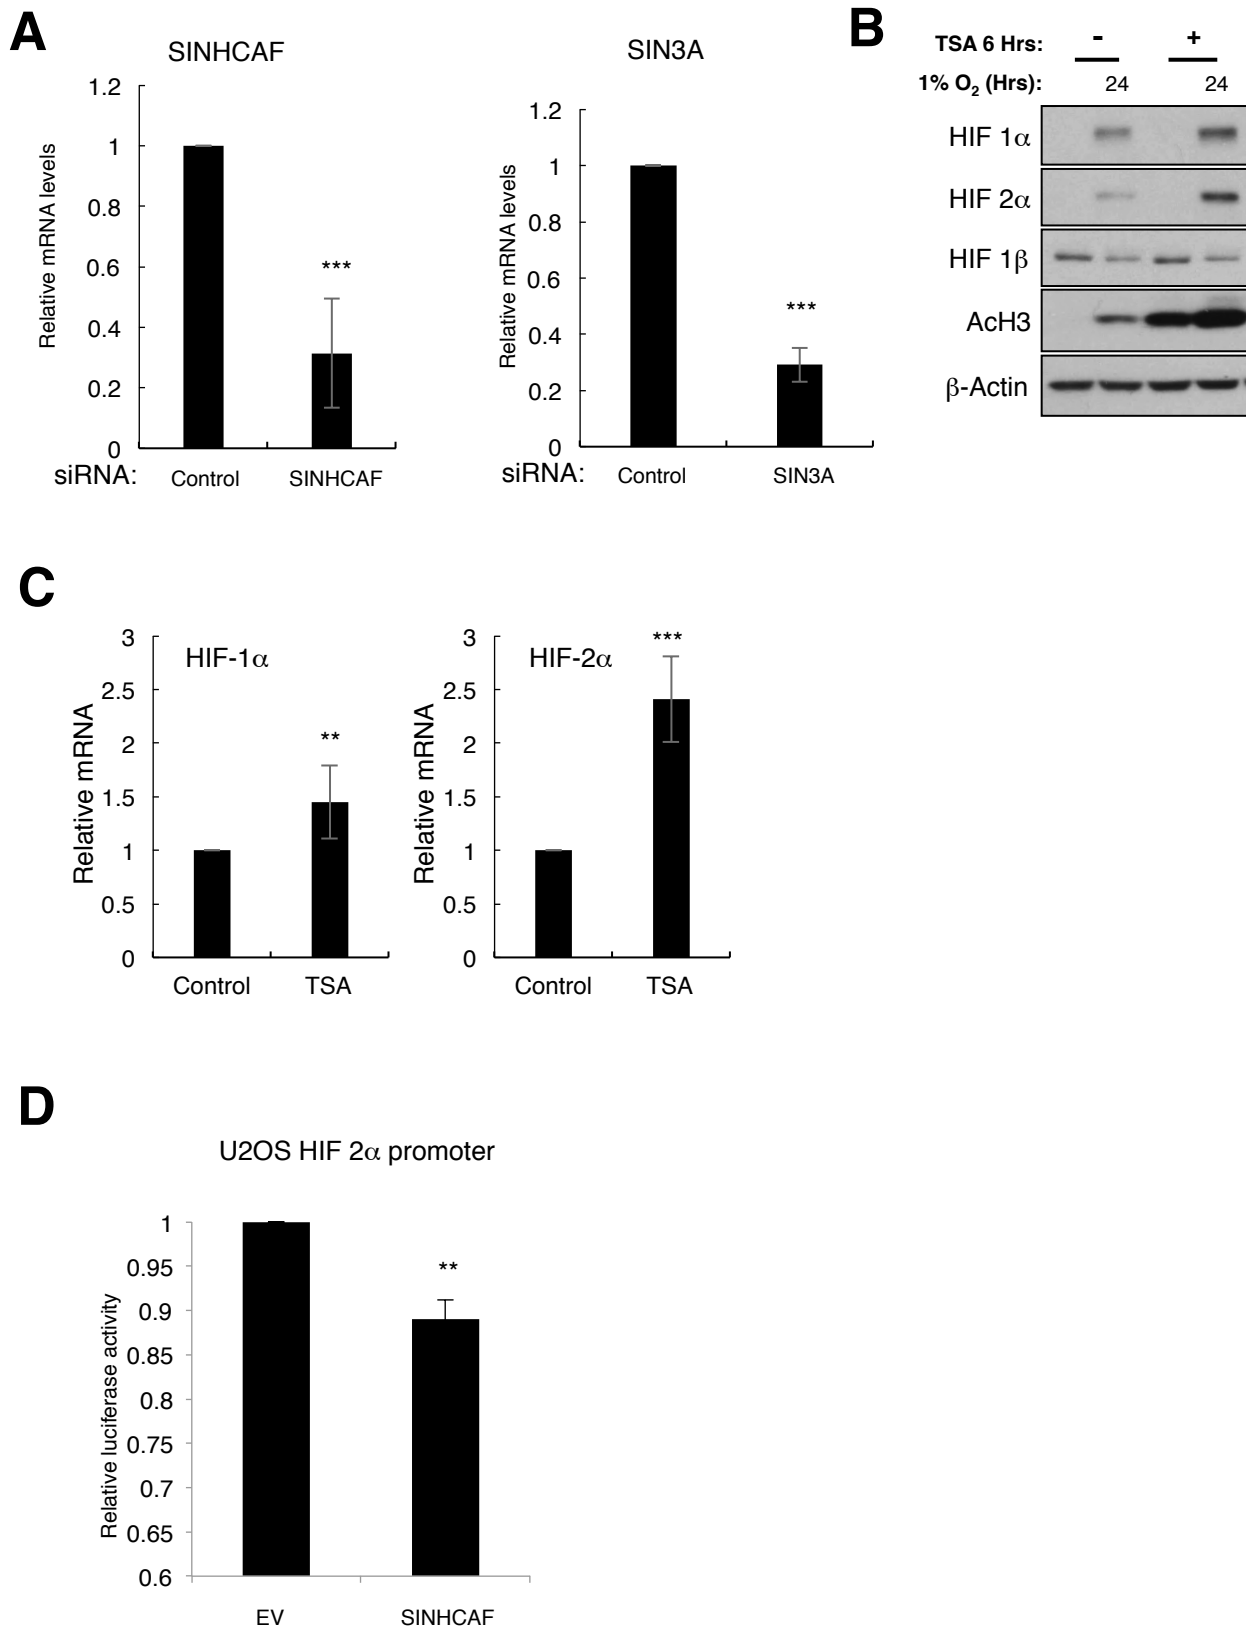

Supplement: Supplementary file [file 176032-2.pdf]
